# Supplementary material for: Chronic meningococcemia: a report of 26 cases and literature review
Source: Springer Nature journal article supplement (doi:10.1007/s15010-018-1238-x), 2018-10-19
Supplement: MOESM1 [file 16212920]

**Chronic meningococcemia – A report of 26 cases and literature review**

Benjamin Lefèvre,¹ Yves Poinsignon,² Caroline Piau,3 François-Charles Javaugue,4 Jean-Philippe Talarmin,5 Maeva Lefebvre,6 Nicolas Varache,7 Hélène Drouin,8 Tattevin P,¹ pour le Groupe d’Epidémiologie et Recherche en Infectiologie du Centre et de l’Ouest (GERICCO)

**Corresponding author:** Pierre Tattevin, E-mail: [pierre.tattevin@chu-rennes.fr](mailto:pierre.tattevin@chu-rennes.fr)

**References of cases included in the literature review**

[1] INVS, Institut National de Veille Sanitaire. “Infections Invasives à Méningocoques,” 2016. http://www.invs.sante.fr/Dossiers-thematiques/Maladies-infectieuses/Maladies-a-declaration-obligatoire/Infections-invasives-a-meningocoques.

[2] WHO, World Health Organization. “Meningococcal Meningitis,” 2016. http://www.who.int/gho/epidemic_diseases/meningitis/en/.

[3] Rosenstein, Nancy E., Bradley A. Perkins, David S. Stephens, Tanja Popovic, and James M. Hughes. “Meningococcal Disease.” *New England Journal of Medicine* 344, no. 18 (May 3, 2001) : 1378–88. doi:10.1056/NEJM200105033441807.

[4] Stephens, David S, Brian Greenwood, and Petter Brandtzaeg. “Epidemic Meningitis, Meningococcaemia, and Neisseria Meningitidis.” *The Lancet* 369, no. 9580 (June 2007) : 2196–2210. doi:10.1016/S0140-6736(07)61016-2.

[5] Benoit, F. L. “CHRONIC MENINGOCOCCEMIA. CASE REPORT AND REVIEW OF THE LITERATURE.” *The American Journal of Medicine* 35 (July 1963) : 103–12.

[6] Salomon, H. “Ueber meningokokkenseptikaemie.” *Berl. Klin. Wocheschr.* 39 (1902) : 1045.

[7] Kernéis, Solen, Emmanuel Mahé, Beate Heym, Valérie Sivadon-Tardy, Françoise Bourgeois, and Thomas Hanslik. “Chronic Meningococcemia in a 16-Year-Old Boy : A Case Report.” *Cases Journal* 2, no. 1 (2009) : 7103. doi:10.4076/1757-1626-2-7103.

[8] Boysson, H. de, S. Deshayes, A. Salmon-Rousseau, A. Dubois, and L. Geffray. “Méningococcémie chronique.” *Médecine et Maladies Infectieuses* 45, no. 1–2 (January 2015) : 54–55. doi: 10.1016/j.medmal.2014.11.002

[9] Prins, J. M., F. N. Lauw, B. H. Derkx, P. Speelman, E. J. Kuijper, J. Dankert, and S. J. van Deventer. “Endotoxin Release and Cytokine Production in Acute and Chronic Meningococcaemia.” *Clinical and Experimental Immunology* 114, no. 2 (November 1998) : 215–19

[10] Farron, F., J. J. Cheseaux, and B. Pelet. “[Chronic meningococcemia and IgA deficiency in an adolescent].” *Archives De Pediatrie: Organe Officiel De La Societe Francaise De Pediatrie* 3, no. 2 (February 1996) : 149–51

[11] Nielsen, H. E., C. Koch, B. Mansa, P. Magnussen, and O. J. Bergmann. “Complement and Immunoglobulin Studies in 15 Cases of Chronic Meningococcemia: Properdin Deficiency and Hypoimmunoglobulinemia.” *Scandinavian Journal of Infectious Diseases* 22, no. 1 (1990) : 31–36

[12] Fasano, M. B., K. Sullivan, L. Ibsen, and J. A. Winkelstein. “Chronic Meningococcemia in a Child with a Deficiency of the Sixth Component of Complement.” *Pediatric Allergy and Immunology: Official Publication of the European Society of Pediatric Allergy and Immunology* 4, no. 4 (November 1993) : 214–16

[13] Brouwer, Matthijs C., Lodewijk Spanjaard, Jan M. Prins, Peter van der Ley, Diederik van de Beek, and Arie van der Ende. “Association of Chronic Meningococcemia with Infection by Meningococci with Underacylated Lipopolysaccharide.” *Journal of Infection* 62, no. 6 (June 2011) : 479–83. doi: 10.1016/j.jinf.2011.03.010

[14] Dupin, N., H. Lecuyer, A. Carlotti, C. Poyart, M. Coureuil, J. Chanal, A. Schmitt, et al. “Chronic Meningococcemia Cutaneous Lesions Involve Meningococcal Perivascular Invasion Through the Remodeling of Endothelial Barriers.” *Clinical Infectious Diseases* 54, no. 8 (April 15, 2012) : 1162–65. doi:10.1093/cid/cis120.

[15] Wenzel, Michael, Lena Jakob, Andreas Wieser, Jürgen Schauber, Konstantinos Dimitriadis, Sören Schubert, and Hans-Walter Pfister. “Corticosteroid-Induced Meningococcal Meningitis in a Patient With Chronic Meningococcemia.” *JAMA Dermatology* 150, no. 7 (July 1, 2014) : 752. doi:10.1001/jamadermatol.2013.9350

[16] Société de pathologie infectieuse de langue française (SPILF). “Practice Guidelines for Acute Bacterial Meningitidis (except Newborn and Nosocomial Meningitis).” *Medecine Et Maladies Infectieuses* 39, no. 6 (June 2009) : 356–67

[17] EUCAST, European Comittee on Antmicrobial Susceptibility testing. “Breakpoint Tables for Interpretation of MICs and Zone Diameters,” 2013. http://www.eucast.org/ast_of_bacteria/previous_versions_of_documents/

[18] Dock, W. “Intermittent Fever of Seven Months Duration Dur to Meningococcemia (with an Analysis of Sixty Eight Reported Cases of Meningococcemia).” *JAMA* 83 (1924) : 31–33.

[19] Ognibene, A. J., and W. R. Dito. “CHRONIC MENINGOCOCCEMIA. FURTHER COMMENTS ON THE PATHOGENESIS OF ASSOCIATED SKIN LESIONS.” *Archives of Internal Medicine* 114 (July 1964) : 29–32.

[20] Bloom, D. S. “CHRONIC MENINGOCOCCEMIA ; EPIDEMIOLOGY, DIAGNOSIS AND TREATMENT.” *California Medicine* 103 (August 1965) : 87–90.

[21] Frank, S. T., and R. M. Gomez. “Chronic Meningococcemia.” *Military Medicine* 133, no. 11 (November 1968) : 918–20.

[22] Fass, R. J., and S. Saslaw. “Chronic Meningococcemia. Possible Pathogenic Role of IgM Deficiency.” *Archives of Internal Medicine* 130, no. 6 (December 1972) : 943–46.

[23] Leibel, R. L., J. J. Fangman, and M. C. Ostrovsky. “Chronic Meningococcemia in Childhood. Case Report and Review of the Literature.” *American Journal of Diseases of Children (1960)* 127, no. 1 (January 1974) : 94–98.

[24] Dennis, J., L. D. Edwards, T. N. Fisher, and L. Makeever. “Endocarditis on a Björk-Shiley Mitral Prosthesis due to Neisseria Meningitidis.” *Scandinavian Journal of Thoracic and Cardiovascular Surgery* 11, no. 3 (1977) : 205–9

[25] Clough, J. D., M. L. Clough, A. Weinstein, L. H. Calabrese, L. R. Mansfield, P. Gulick, T. Gavan, and W. E. Braun. “Familial Late Complement Component (C6, C7) Deficiency with Chronic Meningococcemia.” *Archives of Internal Medicine* 140, no. 7 (July 1980) : 929–33.

[26] Haburchak, D. R. “Sporadic Military Meningococcal Disease : A Diversity of Presentations.” *Southern Medical Journal* 74, no. 2 (February 1981) : 153–56.

[27] Adams, E. M., S. Hustead, P. Rubin, R. Wagner, A. Gewurz, and F. M. Graziano. “Absence of the Seventh Component of Complement in a Patient with Chronic Meningococcemia Presenting as Vasculitis.” *Annals of Internal Medicine* 99, no. 1 (July 1983) : 35–38.

[28] Leung, A., K. Donaldson, and K. R. Wagner. “Case of Chronic Meningococcemia in British Columbia.” *Canadian Medical Association Journal* 132, no. 7 (April 1, 1985) : 821.

[29] Spanjaard, L., P. Bol, and H. C. Zanen. “[Chronic meningococcal septicemia, a forgotten disease].” *Nederlands Tijdschrift Voor Geneeskunde* 129, no. 8 (February 23, 1985) : 352–55.

[30] Chennebault, J.M., Ph. Bourrier, P. Harry, F. Parvery, and J. Achard. “Méningococcémie chronique.” *Médecine et Maladies Infectieuses* 16, no. 6 (June 1986) : 441–42.

[31] Tuso, P. J., and M. J. Ahern. “Chronic Meningococcemia.” *Connecticut Medicine* 51, no. 11 (November 1987) : 698–702.

[32] Morier, P. “Chronic Meningococcemia.” *Dermatologica* 181, no. 3 (1990) : 240–41.

[33] Jennens, I. D., M. O’Reilley, and A. P. Yung. “Chronic Meningococcal Disease.” *The Medical Journal of Australia* 153, no. 9 (November 5, 1990) : 556–59.

[34] Gregory, B., V. Tron, and V. C. Ho. “Cyclic Fever and Rash in a 66-Year-Old Woman. Chronic Meningococcemia.” *Archives of Dermatology* 128, no. 12 (December 1992) : 1645, 1648.

[35] Pena, J., M. J. Méndez-Bustelo, and E. del-Río. “Chronic Meningococcemia in an Immunocompetent Girl.” *International Journal of Dermatology* 33, no. 7 (July 1994) : 501–2.

[36] Suriñach, J. M., J. Alegre, V. García Patos, A. Planes, and T. Fernández de Sevilla. “[Chronic meningococcemia caused by Neisseria meningitidis of serogroup C].” *Enfermedades Infecciosas Y Microbiologia Clinica* 13, no. 7 (September 1995) : 439–40.

[37] Coul, M. E. op de, and G. Kardos. “[An unusual cause of fever: chronic meningococcemia].” *Nederlands Tijdschrift Voor Geneeskunde* 140, no. 14 (April 6, 1996) : 785–87.

[38] Ploysangam, Tanusin, and Anita P. Sheth. “Chronic Meningococcemia in Childhood: Case Report and Review of the Literature.” *Pediatric Dermatology* 13, no. 6 (November 1996) : 483–87. doi:10.1111/j.1525-1470.1996.tb00729.x.

[39] Sopeña, B., F. Touza, M. Freire, and C. Martínez-Vázquez. “[Chronic meningococcemia: a rare cause of migratory arthritis].” *Anales De Medicina Interna (Madrid, Spain : 1984)* 13, no. 4 (April 1996) : 206–7.

[40] Kruijtzer, C. M., A. G. Buiting, and S. J. Graafsma. “Chronic Meningococcaemia: A Case Report.” *The Netherlands Journal of Medicine* 50, no. 3 (March 1997) : 102–4

[41] Grouteau, E., S. Chaminade, C. Karsenty, Y. Chaix, M. F. Prère, and J. P. Carrière. “[Chronic meningococcemia: 3 cases in the immunocompetent child].” *Archives De Pediatrie: Organe Officiel De La Societe Francaise De Pediatrie* 5, no. 11 (November 1998) : 1232–35.

[42] Person, D. A., and M. D. Moore. “Chronic Meningococcemia Mimicking Acute Rheumatic Fever.” *Hawaii Medical Journal* 57, no. 8 (August 1998) : 583–84.

[43] Grob, H., R. Frei, A. Tyndall, and P. H. Itin. “[Chronic meningococcemia--a rare, but characteristic disease picture].” *Schweizerische Medizinische Wochenschrift* 128, no. 50 (December 12, 1998): 1988–93.

[44] Germann, D., K. Baumann, and R. Rüdt. “[Wxanthema and acute polyarthritis in a young patient].” *Praxis* 89, no. 47 (November 23, 2000) : 1959–62.

[45] Totan, M. “An Uncommon Presentation: Chronic Meningococcaemia Associated with Cholestatic Hepatitis in a Turkish Child.” *Journal of Tropical Pediatrics* 50, no. 6 (December 1, 2004) : 372–74. doi:10.1093/tropej/50.6.372.

[46] Carré, D., A. Dompmartin, K. Sannier, L. Verneuil, P. Bravard, and D. Leroy. “[Chronic meningococcemia].” *Annales De Dermatologie Et De Venereologie* 132, no. 4 (April 2005) : 355–58.

[47] Harwood, C. A., J. C. Stevens, D. Orton, R. C. Bull, D. Paige, M. P. A. Lessing, P. S. Mortimer, R. A. Marsden, and R. Cerio. “Chronic Meningococcaemia: A Forgotten Meningococcal Disease.” *The British Journal of Dermatology* 153, no. 3 (September 2005) : 669–71. doi:10.1111/j.1365-2133.2005.06771.x.

[48] Speranza, Giovanna, and Sepehr Javaheri. “Flu-like Illness—and a Rash.” *The Lancet* 372, no. 9639 (August 2008) : 688. doi:10.1016/S0140-6736(08)61281-7.

[49] Martínez, Jorge V., Sergio C. Verbanaz, Rosana Jordán, Natalia Enríquez, and Ernesto D. Efrón. “[Chronic meningococcemia].” *Medicina* 68, no. 4 (2008) : 298–300.

[50] Parmentier, Laurent, Christian Garzoni, Christophe Antille, Laurent Kaiser, Béatrice Ninet, and Luca Borradori. “Value of a Novel Neisseria Meningitidis–Specific Polymerase Chain Reaction Assay in Skin Biopsy Specimens as a Diagnostic Tool in Chronic Meningococcemia.” *Archives of Dermatology* 144, no. 6 (June 1, 2008). doi:10.1001/archderm.144.6.770.

[52] Theulin, Arnaud, Murielle Rondeau-Lutz, Cornelia Kuhnert, Julien Boileau, and Jean-Christophe Weber. “Chronic Meningococcaemia and Immunoglobulin A Deficiency.” *Journal of Medical Microbiology* 59, no. Pt 11 (November 2010) : 1375–78. doi:10.1099/jmm.0.021980-0.

[53] Roux, M., S. Sire, V. Lalande, A. Le Coustumier, K.-P. Tiev, C. Tolédano, L. Josselin-Mahr, M. Gain, J. Cabane, and A. Kettaneh. “[Recurrent fever and skin eruption revealing chronic meningococcemia].” *La Revue De Medecine Interne* 31, no. 6 (June 2010) : 445–48. doi:10.1016/j.revmed.2009.11.010.

[54] Bonville, Cynthia A., Manika Suryadevara, Olamide Ajagbe, and Joseph B. Domachowske. “Chronic Meningococcemia Presenting as a Recurrent Painful Rash without Fever in a Teenage Girl.” *The Pediatric Infectious Disease Journal* 34, no. 6 (June 2015) : 670–72. doi:10.1097/INF.0000000000000700.

[55] Thimmesch, M., E. Bodart, P. Gavage, J.-P. Misson, and J. Frère. “[Two case reports of meningococcemia. Review of the literature on chronic meningococcemia].” *Archives De Pediatrie: Organe Officiel De La Societe Francaise De Pediatrie* 23, no. 6 (June 2016) : 595–98. doi:10.1016/j.arcped.2016.03.011.

[56] Miguel-Gomez, Laura, Lorea Bagazgoitia, Angela Hermosa-Gelbard, Natalia Sanchez-Neila, Aida Lopez-de Pedro, and Kary Quiñones-Coneo. “Chronic Meningococcemia in an Immunocompetent Child.” *Journal of Paediatrics and Child Health* 52, no. 8 (August 2016) : 853–54. doi:10.1111/jpc.13164.
